# Supplementary material for: Establishing reference values for age-related fecal calprotectin in healthy children aged 0–4 years: a systematic review and meta-analysis
Source: PeerJ. 2025 Jun 12;13:e19572. doi: 10.7717/peerj.19572 (PMC12169166; doi:10.7717/peerj.19572)
Supplement: Supplemental Information 7 [file peerj-13-19572-s007.xlsx]

## Sheet: Number of patients
List	Study	year	Location	Study design	Measurement method	Assay	Manufacturer	Age，Number of subjects									type of feeding，Number of subjects			mode of delivery ，Number of subjects
								<1m	1-6m	6-12m	12-24m	2-3y	3-4y	4-8y	8-12y	12-18y	breast-fed	formula-fed	mixed feeding	normal spontaneous vaginal delivery(NSVD)	caesarean section (CSD)
1	Marta	2019	Spain	Cross-sectional study	lateral flow chromatographic immunoassay(LFIA)	Quantum Blue fCAL	BÜHLMANN	43	64	46	42	45	20	64	46	45	69	26	9
2	Campeotto	2003	France	prospective	ELISA	Calprest	Eurospital			69							32	18
3	Li F	2015	China	prospective	ELISA	fCAL ELISA	BÜHLMANN		136	102							90	148
4	Hestvik	2011	Uganda	cross-sectional study	ELISA	Phical	CALPRO	14	27	27				159
5	Rugtveit	2002	Norway	/	ELISA	Phical	CALPRO	21	20	22	20	89
6	Nissen	2004	Netherlands	/	ELISA	Calprest	Eurospital	27
8	Oord T	2014	Denmark	retrospective study	ELISA	fCAL ELISA	BÜHLMANN		9	12	20	24	8
9	Zhu Q	2016	China	prospective	ELISA	fCAL ELISA	BÜHLMANN				72	50	45
10	Song J	2016	South Korea	prospective	Fluorescence Enzyme Immunoassay(FEIA)	ImmunoCAP	Phadia				39	30	55
11	Macqueen	2018	USA	prospective	ELISA	PhiCal	Genova	38	211								34	24	191
12	Lee Y	2017	South Korea	prospective	FEIA	ImmunoCAP	Phadia	62	43								38	37		57	76
13	Günaydın	2020	Turkey	cross-sectional	ELISA	IDK Calprotectin	Immundiagnostik AG	22	48	14							59	12		31	53
14	Garg	2017	Australia	prospective	ELISA	Phical	CALPRO				12	16	24	54
15	Park	2020	JAPAN	prospective	ELISA	Phical	CALPRO	146
16	Rouge	2010	France	prospective	ELISA	Calprest	Eurospital	47									104	21
17	Roca	2017	Spain	prospective	FEIA	ImmunoCAP	Phadia	51			17	23	20
18	Łoniewska	2020	Poland	prospective	ELISA	IDK Calprotectin	Immundiagnostik	74	70	64	49									39	61
19	Li F	2014	China	prospective	ELISA	fCAL ELISA	BÜHLMANN		54								54	51
20	Campeotto	2020	France	prospective	ELISA	Calprest	Eurospital		121
21	Zoonen	2019	Netherlands	prospective	ELISA	fCAL ELISA	BÜHLMANN	100
22	Laforgia	2003	Italy	prospective	ELISA	Calprest	Eurospital	131												44	87
23	Jung	2020	South Korea	prospective	FEIA	ImmunoCAP	Phadia	228												68	160
24	Myjak	2017	Poland	prospective	ELISA	Phical	CALPRO	20												239	437

## Sheet: Raw FC
List	Study	Descriptive Statistics	Age，FC									type of feeding，FC Median (number)			mode of delivery ，FC Median (number)
			<1m	1-6m	6-12m	12-24m	2-3y	3-4y	4-8y	8-12y	12-18y	breast-fed	formula fed	mixed feeding	normal spontaneous vaginal delivery(NSVD)	caesarean section (CSD)
1	Marta	Median (IQR)	303(210,412)	325(240,615)	63(45,171)	97(80,355)	71(50,180)		46(28,117)	34(12,60)	30(5,50)	343(20.412)	274(34,344)	331(10,301)
2	Campeotto	Median (Range)			167(22-860)							204(62-860)	148(45-480)
3	Li F	Median (Range)		282(47,545)	114(6,937)							323(30,923)	148(30,572)
4	Hestvik	Median (95%CI)	345(195,621)	278(85,988)	183(109,418)
5	Rugtveit	Median (95%CI)	269(276,847)	263(185,618)	78(61,188)	67(63,191)	64(70,184)		49(34,87)
6	Nissen	Median (Range)	235(172-2880)
8	Oord T	Median (Range)		192(29-537)	72(31-201)	47(29-223)	31(29-70)	36(29-70)
9	Zhu Q	Median (Range)				18(12-24)	31(24-35)	40(36-48)
10	Song J	Mean(SD)				145±185	101±176	22±26
11	Macqueen	Median (IQR)	123(51,193)	148(91,246)								119(82,187)	108(77,215)	153(96,268)
12	Lee Y	Mean(SD)	322±318	197±209								445±385	110±95		319±185	130±48
13	Günaydın	Median (95%CI)	589(123,1481)	304(20,1817)	147(10,802)							449(49,1368)	249(12,587)		208(11,425)	441(33,957)
14	Garg	Median (Range)				90(17-445)	67(17-488)	27(17-46)	23(15-86)
15	Park	Median (IQR)	154(70,346)
16	Rouge	Median (IQR)	138(58,271)									126(55,237)	226(116,334)
17	Roca	Median (Range)	186(20-2964)			85(8-843)	45(16-573)	30(20-851)
18	Łoniewska	Median (Range)	149(12-681)	109(2-1378)	74(3-1447)	59(2-495)									158(5-419)	65(6-141)
19	Li F	Median (Range)		288(35-937)								377(35-937)	233(37-895)
20	Campeotto	Median (Range)		88（8-798）
21	Zoonen	Median (Range)	332(40-8230)
22	Laforgia	Mean(SD)	145±78												144±62	162±85
23	Jung	Median (Range)	134(11–2000 )												141(77–397)	123(52–403)
24	Myjak	Median (Range)	227(34-1067)
